# Supplementary material for: The Ameliorative Effects of Fucoidan in Thioacetaide-Induced Liver Injury in Mice
Source: PubMed Central journal article supplement (PMC8036993; doi:10.3390/molecules26071937), 2021-03-30
Supplement: molecules-26-01937-s001.pdf [file molecules-26-01937-s001.pdf]

## Supplementary Materials

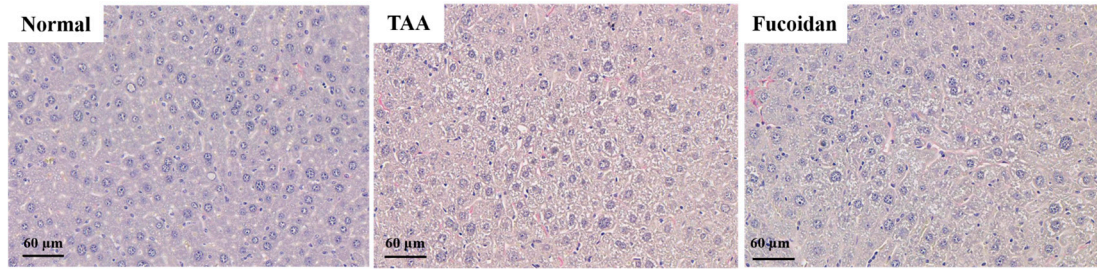

**Figure 1.** Changes of liver histology by sirius red staining (magnification, 200×).

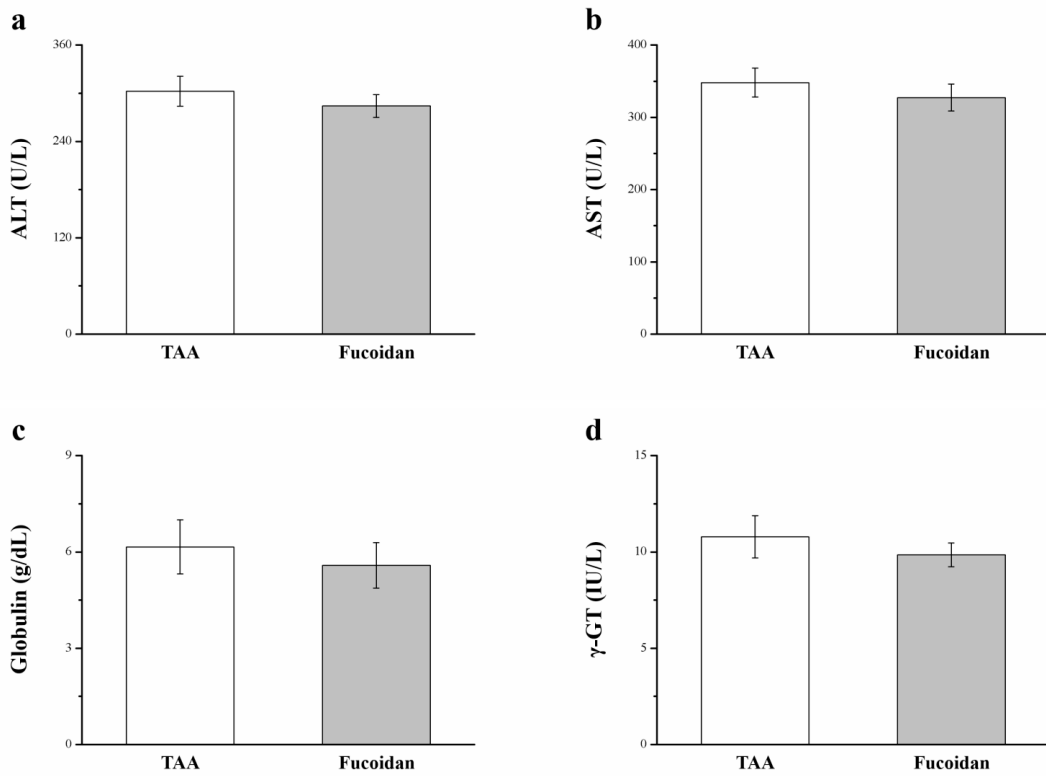

**Figure 2.** Changes of serum ALT, AST, globulin, and  $\gamma$ -GT levels in TAA-induced liver injury mice, and fucoïdan (10 mg/kg)-treated mice with TAA-induced liver injury, over a period of 42 days.
